# Supplementary material for: PE11, a PE/PPE family protein of Mycobacterium tuberculosis is involved in cell wall remodeling and virulence
Source: PubMed Central journal article supplement (PMC4763214; doi:10.1038/srep21624), 2016-02-23
Supplement: srep21624-s1.pdf [file srep21624-s1.pdf]

**PE11, a PE/PPE family protein of *Mycobacterium tuberculosis* is involved in cell wall remodeling and virulence**

Parul Singh<sup>1,2</sup>, Rameshwaram Nagender Rao<sup>1</sup>, Jala Ram Chandra Reddy<sup>3</sup>, R.B.N. Prasad<sup>3</sup>, Sandeep Kumar Kotturu<sup>4</sup>, Sudip Ghosh<sup>4</sup> and Sangita Mukhopadhyay<sup>1,\*</sup>

1 Laboratory of Molecular Cell Biology, Centre for DNA Fingerprinting and Diagnostics (CDFD), Nampally, Hyderabad, India

2 Graduate Studies, Manipal University, Manipal, Karnataka, India

3 Centre for Lipid Research, CSIR-Indian Institute of Chemical Technology, Uppal Road, Hyderabad, India

4 Molecular Biology Division, National Institute of Nutrition (ICMR), Jamai-Osmania PO, Hyderabad, India

**\*To whom correspondence should be addressed:** Sangita Mukhopadhyay, Laboratory of Molecular Cell Biology, Centre for DNA

Fingerprinting and Diagnostics (CDFD), Bldg. 7, Gruhakalpa, 5-4-399/B, Nampally, Hyderabad - 500001, India. Tel: 91-40-24749423;

Fax: 91-40-24785447; E-mail: [sangita@cdfd.org.in](mailto:sangita@cdfd.org.in); [sangitacdfd@gmail.com](mailto:sangitacdfd@gmail.com)

## Supplementary Figure 1

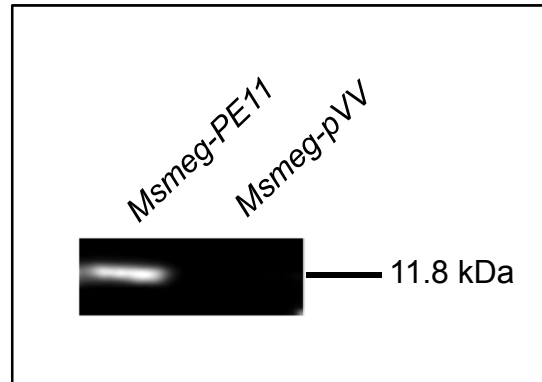

**Supplementary Figure 1: Expression of *M. tuberculosis* PE11 in *M. smegmatis* mc<sup>2</sup>155 bacteria.** *M. smegmatis* harboring either the backbone vector (*Msmeg-pVV*) or the *pe11* gene cloned into pVV16 vector (*Msmeg-PE11*) were cultured at 37°C in 7H9 medium with 0.05% Tween 80 and at an OD 0.6. The bacterial cell lysates were loaded (50 µg) onto an SDS-PAGE gel and subjected to immunoblot analysis to detect His tagged PE11 protein using rabbit anti-Histidine tag antibody as primary and HRP conjugated goat anti-rabbit IgG as the secondary antibody. The blot was visualized by chemiluminescence following the manufacturer's instructions (GE Healthcare, UK).

## Supplementary Figure 2

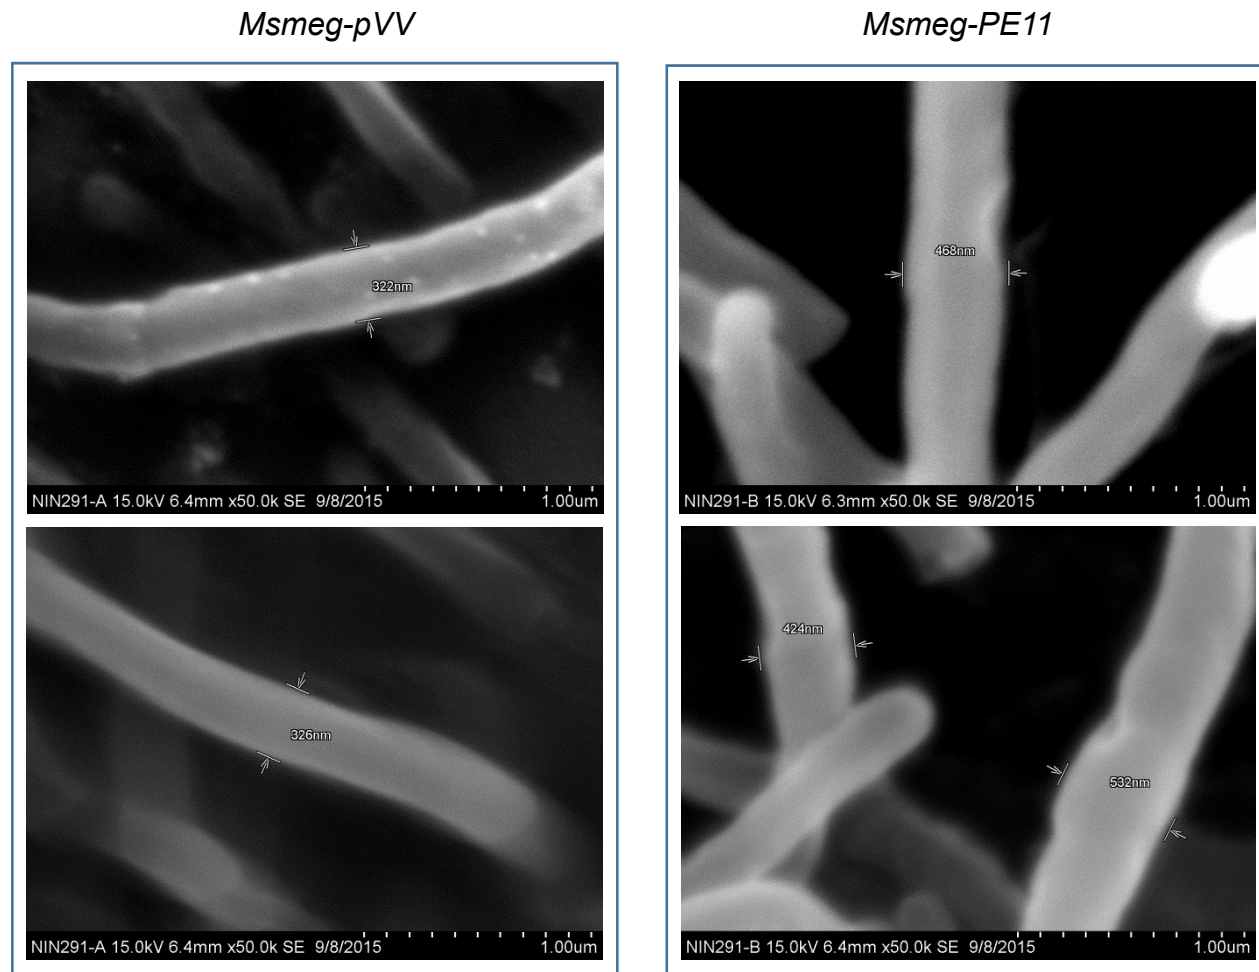

**Supplementary Figure 2: PE11 causes an increase in cell width of *M. smegmatis*.** *Msmeg-pVV* or *Msmeg-PE11* were cultured in 7H9 medium with 0.05% Tween 80 and at an OD 0.6 (OD<sub>600 nm</sub>), bacteria were harvested for scanning electron microscopy (SEM) analysis to compare cell width. Scale bar, 1 μm. Two representative pictures for *Msmeg-pVV* (left column) and *Msmeg-PE11* (right column) are shown.

### Supplementary Figure 3

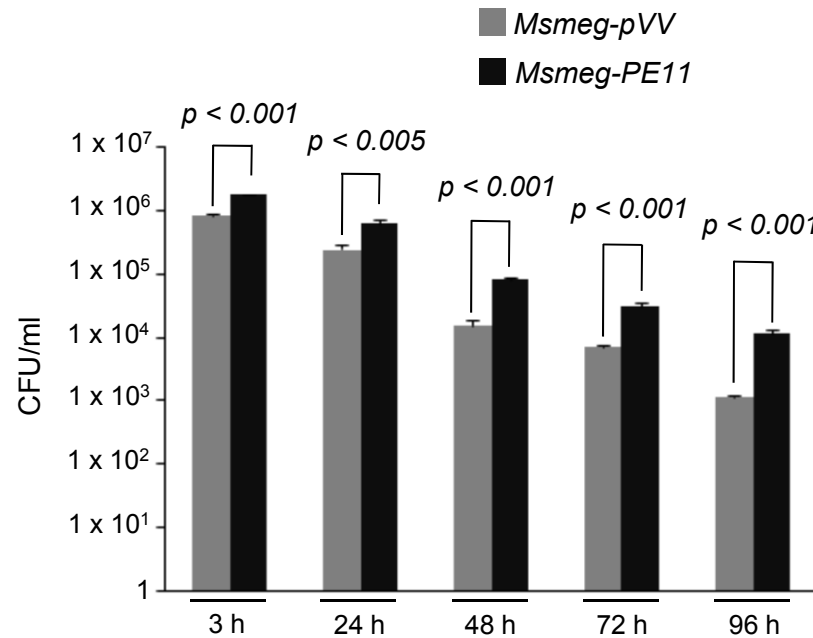

**Supplementary Figure 3: Expression of PE11 in *M. smegmatis* enhances intracellular survival of the bacilli in Balb/c peritoneal macrophages.** The thioglycollate elicited peritoneal macrophages ( $0.5 \times 10^6$  cells/well/ml in 24 well tissue culture plate) from Balb/c mice were infected with *Msmeg-pVV* or *Msmeg-PE11* at 1:10 MOI and harvested at various time points post-infection. Cells were next washed, lysed and plated in triplicate on Middlebrook 7H10 agar plates supplemented with 10% OADC, 25  $\mu$ g/ml kanamycin and 50  $\mu$ g/ml hygromycin B for CFU counts. Results are representative of mean  $\pm$  SD of three different experiments.

**Supplementary Figure 4**

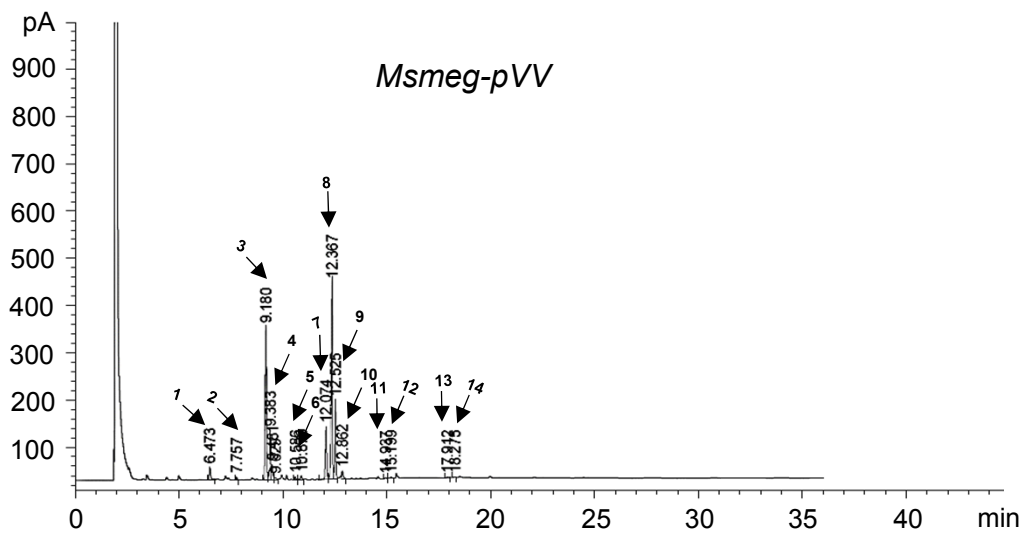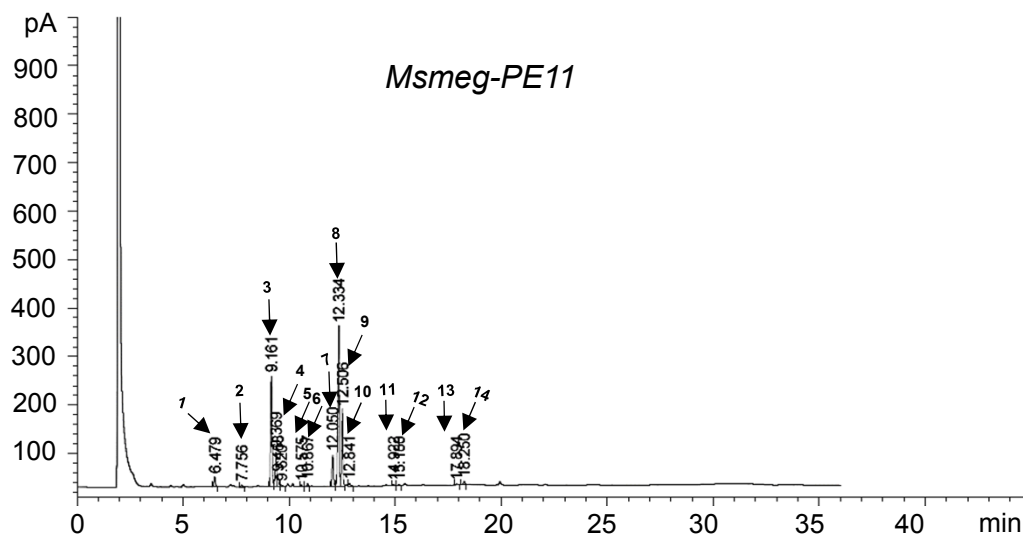

**Supplementary Figure 4: Typical GC chromatograms of *Msmeg-pVV* and *Msmeg-PE11*.** Peaks of fatty acid methyl esters of *Msmeg-pVV* or *Msmeg-PE11* : 1, C14:0; 2, C15:0; 3, C16:0; 4, C16:1; 5, C17:0; 6, C17:1; 7, C18:0; 8, C18:1; 9, C18:0-10 methyl; 10, C18:2; 11, C20:0; 12, C20:1; 13, C22:0; 14, C22:1; the number of X:Y, e.g., indicates the carbon number X and Y double bond(s).

## Supplementary Figure 5

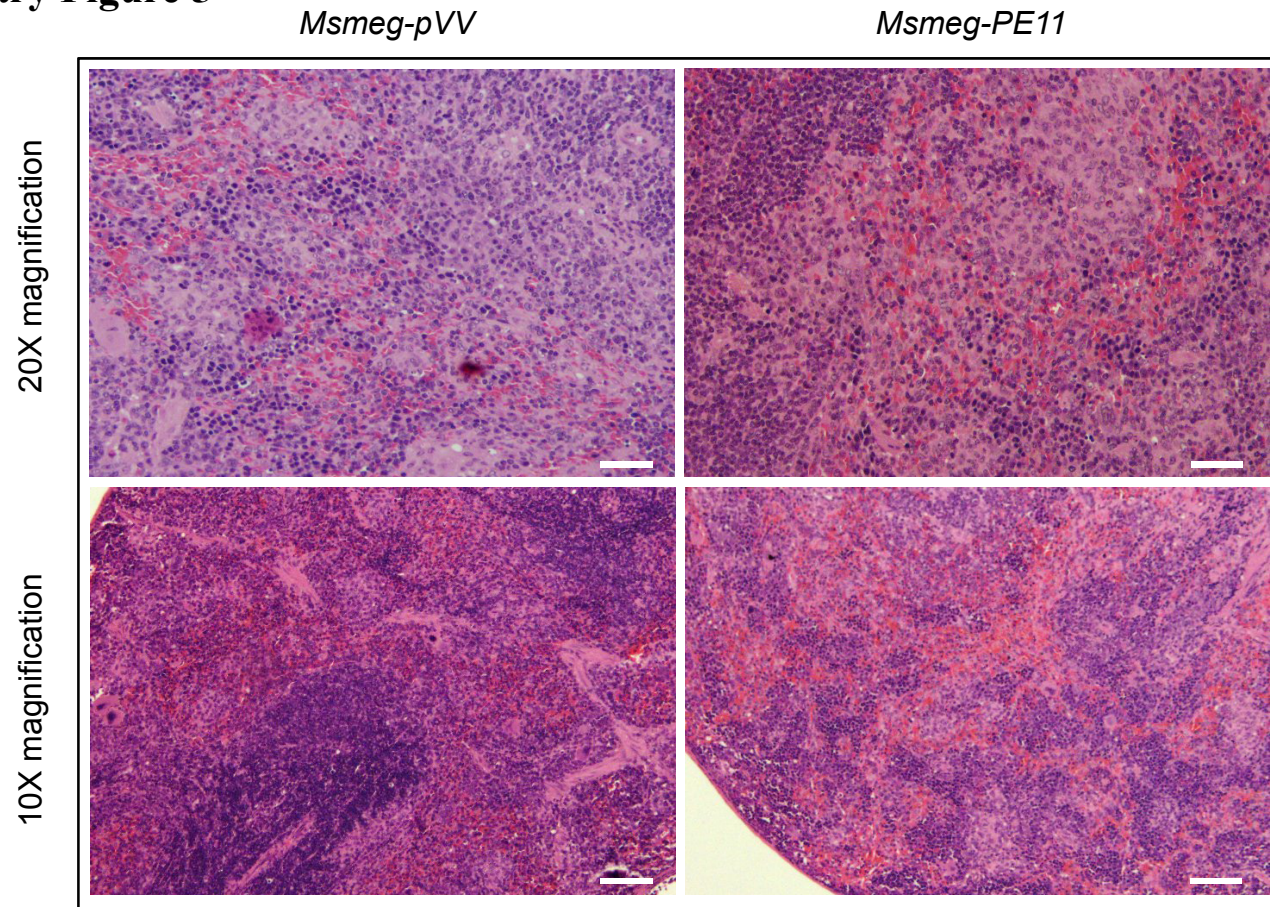

**Supplementary Figure 5: Histopathology of spleen of Balb/c mice infected with *Msmeg-pVV* or *Msmeg-PE11* at day 14 post-infection.** H & E stained spleen sections from *Msmeg-pVV* or *Msmeg-PE11* strain infected mice were observed at 10X or 20X magnification. Scale bar, 200  $\mu$ m.



## Supplementary Figure 6

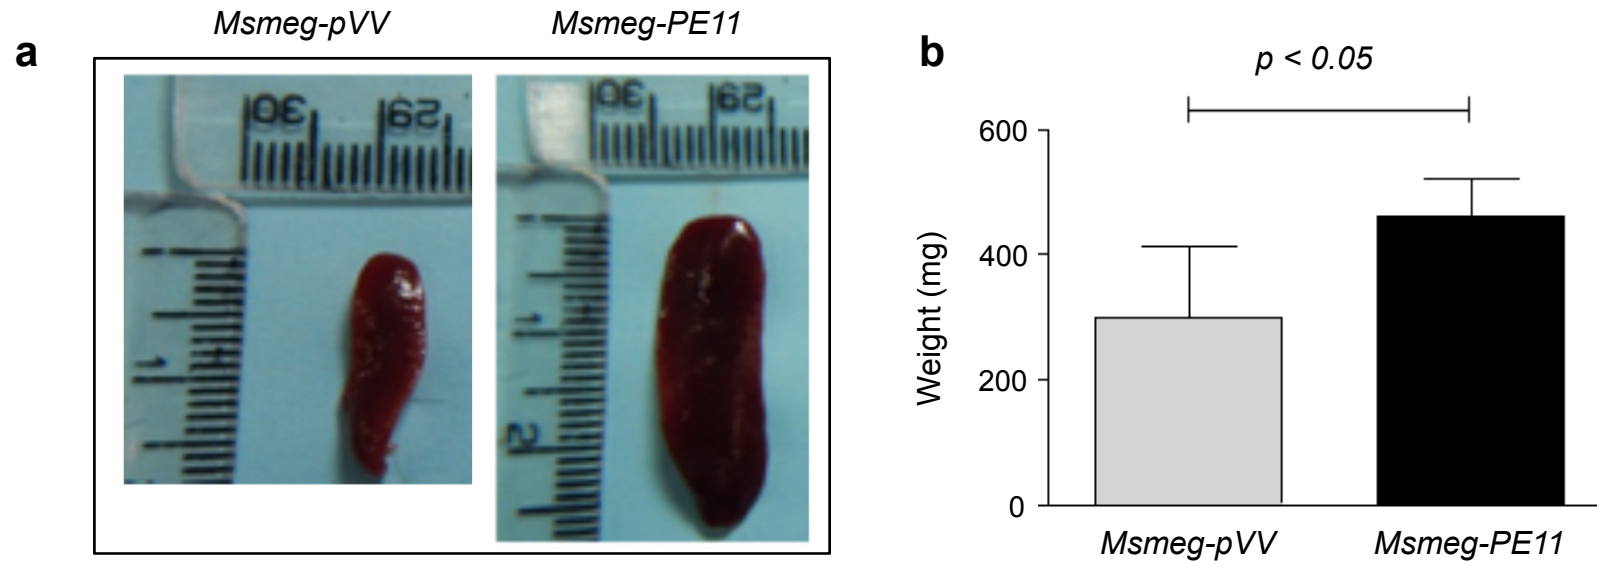

**Supplementary Figure 6: Infection of Balb/c mice with *Msmeg-PE11* causes an increase in spleen size and weight.** Spleens isolated from Balb/c mice at day 14 after intravenous administration of *Msmeg-pVV* or *Msmeg-PE11* showed an increase in size (**a**) and weight (**b**) when compared with spleen of Balb/c mice infected with *Msmeg-pVV*. Data shown is mean  $\pm$  SD for 6 mice per group.

## Supplementary Figure 7

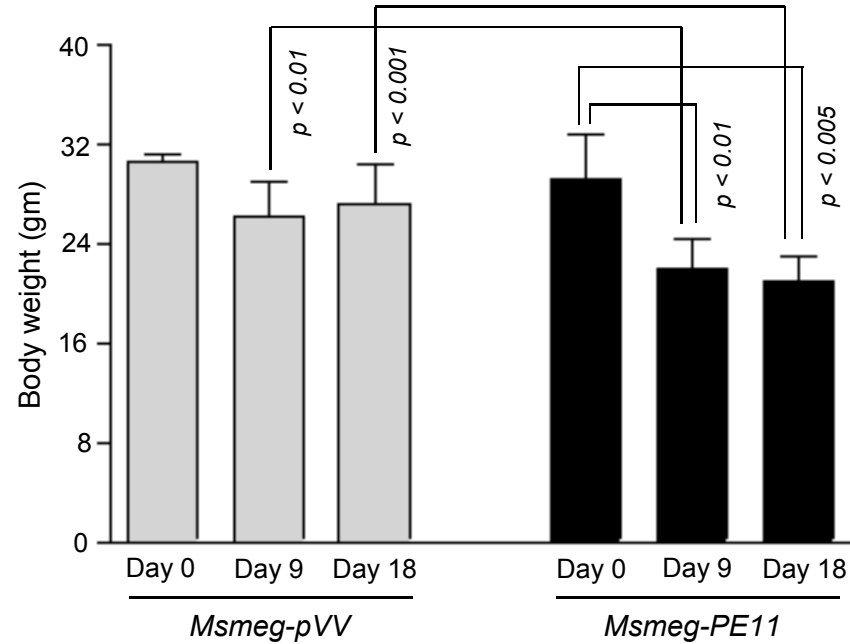

**Supplementary Figure 7: Decreased body weight of mice infected with *Msmeag-PE11* compared to *Msmeag-pVV*.** Body weight of mice was taken before (day 0) and 9 and 18 days after they were infected with either *Msmeag-pVV* or *Msmeag-PE11*. Data shown are mean  $\pm$  SD for a total of 7 mice.



## Supplementary Figure 8

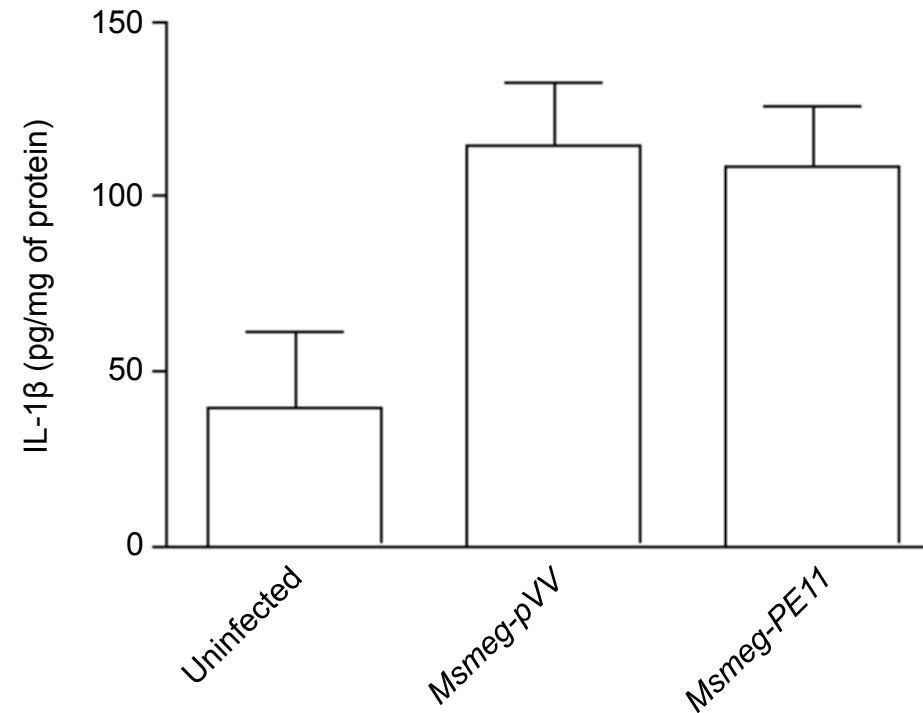

**Supplementary Figure 8: Figure. IL-1 $\beta$  profile of Balb/c mice infected with *Msmeg-pVV* and *Msmeg-PE11* at day 7 post-infection.** Balb/c mice were infected intravenously with  $5 \times 10^7$  *Msmeg-pVV* or *Msmeg-PE11*. At day 7 post-infection mice were sacrificed and lungs were harvested and homogenized in RIPA buffer containing protease inhibitor. After centrifugation at 14,000 rpm for 20 minutes at 4°C, the supernatants were collected and total protein concentrations in the lung tissue homogenates were determined using a BCA kit (Thermo Scientific, USA). The levels of IL-1 $\beta$  in lung tissue homogenates were measured by two-site sandwich enzyme immune assay (EIA) following the manufacturer's protocol (BD Pharmingen, San Jose, CA, USA). Standard curves for IL-1 $\beta$  was obtained using the recombinant standard protein provided along with the kit. Data shown are mean  $\pm$  SD of 4 mice per group.

## Supplementary Figure 9

| <b>Primers</b>                   | <b>Sequence (5'-3')</b> | <b>Annealing Temperature (°C)</b> |
|----------------------------------|-------------------------|-----------------------------------|
| <b>GAPDH-F</b>                   | ACAAC TTTGTCAAGCTCATTTC | 59                                |
| <b>GAPDH-R</b>                   | GATAGGGCCTCTCTTGCTCA    |                                   |
| <b>IL-1<math>\beta</math>-F</b>  | CCTCAATGGACAGAATATCAACC | 62.5                              |
| <b>IL-1<math>\beta</math>-R</b>  | GATCCACACTCTCCAGCTG     |                                   |
| <b>TNF-<math>\alpha</math>-F</b> | GCTTTCCGAATTCCTGGAGC    | 57                                |
| <b>TNF-<math>\alpha</math>-R</b> | CACCTCAGGGAAGAATCTGGA   |                                   |
| <b>IL-4-F</b>                    | CGGCACAGAGCTATTGATGGG   | 61.4                              |
| <b>IL-4-R</b>                    | CCCTTCTCCTGTGACCTCGT    |                                   |
| <b>IL-10-F</b>                   | CTGAAGACCCTCAGGATGCG    | 57                                |
| <b>IL-10-R</b>                   | GACACCTTGGTCTTGGAGCTTA  |                                   |

**Supplementary Figure 9: Sequence of the primers used for RT-qPCR.**
